# Supplementary material for: Downstream Transport of Geosmin Based on Harmful Cyanobacterial Outbreak Upstream in a Reservoir Cascade
Source: MDPI journal article supplement (doi:10.3390/ijerph19159294), 2022-07-29
Supplement: s1 [file s1]

**Supplementary Table S1.** General geographic and limnological features of hydropower and multipurpose dam reservoirs located in the North-Han and the Han Rivers system.

| Attribute                                                | Hwacheon   | Chuncheon   | Soyang     | Euiam      | Cheongpyeong | Paldang     |
|----------------------------------------------------------|------------|-------------|------------|------------|--------------|-------------|
| River system                                             | North-Han  | North-Han   | Soyang     | North-Han  | North-Han    | Han         |
| Elevation (EL.m)                                         | 183.0      | 104.9       | 198.0      | 73.3       | 52.0         | 27.0        |
| Longitudinal distance (km)                               | 122.9      | 89.7        | 80.0       | 70.3       | 26.5         | 0.0         |
| Watershed area (km <sup>2</sup> )                        | 3901       | 4736        | 2703       | 7709       | 9921         | 23800       |
| Yearly average precipitation (mm)                        | 1137.0     | 1161.0      | 1100.0     | 1129.1     | 1165.3       | 1159.9      |
| Yearly average inflow (m <sup>3</sup> s <sup>-1</sup> )  | 92.8       | 111.4       | 55.5       | 185.2      | 229.7        | 538.5       |
| Yearly average outflow (m <sup>3</sup> s <sup>-1</sup> ) | -          | -           | -          | -          | -            | -           |
| Dam hight (m)                                            | 81.5       | 40.0        | 123.0      | 23.0       | 31.0         | 29.0        |
| Dam length (m)                                           | 435.0      | 453.0       | 530.0      | 273.0      | 407.0        | 575.0       |
| Dam type                                                 | CG         | CG          | ER         | CG         | CG           | CG          |
| Flood water level (EL.m, FWL)                            | 183.0      | 104.9       | 198.0      | 73.8       | 52.0         | 27.0        |
| Normal high water level (EL.m, NHWL)                     | 181.0      | 103.0       | 193.5      | 71.5       | 51.0         | 25.5        |
| Restricted water level (EL.m, RWL)                       | 175.0      | 102.0       | 190.3      | 70.5       | 50.0         | -           |
| Low water level (EL.m, LWL)                              | 156.8      | 98.2        | 150.0      | 66.3       | 46.0         | 25.0        |
| Penstock level (EL.m)                                    | 103.0      | 74.1        | 78.5       | 55.2       | 27.1         | 13.5        |
| Total impoundment (10 <sup>6</sup> m <sup>3</sup> )      | 1018.0     | 150.0       | 2900.0     | 80.0       | 185.5        | 244.0       |
| Efficiency impoundment (10 <sup>6</sup> m <sup>3</sup> ) | 658.0      | 61.0        | 1900.0     | 57.5       | 82.6         | 18.0        |
| Flood control quantity (10 <sup>6</sup> m <sup>3</sup> ) | 213.0      | -           | 500.0      | -          | -            | -           |
| Reservoir area (km <sup>2</sup> )                        | 38.2       | 14.3        | 70.0       | 15.5       | 17.6         | 36.5        |
| Watergate type and numbers                               | Roller, 16 | Tainter, 12 | Tainter, 5 | Roller, 14 | Roller, 24   | Tainter, 15 |
| Hydropower generation (GWh yr <sup>-1</sup> )            | 326        | 145         | 353        | 161        | 272          | 378         |
| Construction year                                        | 1944       | 1965        | 1973       | 1967       | 1943 (~1968) | 1974        |

CG: concrete gravity, ER: rock-fill embankment.
